# Supplementary material for: Bioactive Metabolites from UV-Resistant Streptomyces alkaliterrae CH-8 in Desert Soil: In-Vitro Study on Their Potent Antioxidant and Antibiofilm Activities
Source: Research Square preprint supplement (doi:10.21203/rs.3.rs-7264315/v1), 2025-08-11
Supplement: Supplementary file 1 [file 17008686a6bb9162ac9fc8f7.docx]

**Supplementary Materials**

**Bioactive Metabolites from UV-Resistant *Streptomyces alkaliterrae* CH-8 in Desert Soil: In-Vitro Study on Their Potent Antioxidant and Antibiofilm Activities**

Tayyaba Alama, Salah Ud Dina, Afaq Ahmada,Mahwish Alib, Malik Badshaha, Samiullah Khana, Fariha Hasana, Muhammad Farmanc, Aamer Ali Shaha*

a Department of Microbiology, Faculty of Biological Sciences, Quaid-i-Azam University, Islamabad 45320, Pakistan.

b Department of Biological Sciences, National University of Medical Sciences, Rawalpindi 46000, Pakistan

c Department of Chemistry, Faculty of Natural Sciences, Quaid-i-Azam University, Islamabad 45320, Pakistan

**Runing Title:** Bioactive metabolites from UV-Resistant Streptomyces alkaliterrae with potent antioxidant and antibiofilm activities

***Corresponding author:**

Prof. Dr. Aamer Ali Shah

Department of Microbiology, Faculty of Biological Sciences,

Quaid-i-Azam University, Islamabad 45320, Pakistan.

E-mail: [alishah@qau.edu.pk](mailto:alishah@qau.edu.pk)

**Figures S1. Growth parameters**

**Figure S1.** Growth parameters optimization of *S. alkaliterrae* CH-8 strain for maximum optical density. Growth curves formulated under various conditions including. **(A)** Temperature optimization curve; **(B)** pH curve in the range of 7.0-10.0; **(C)** Media optimization curve **(D)** Carbon source optimization; **(E)** Salt tolerance in the range of 1-8%.


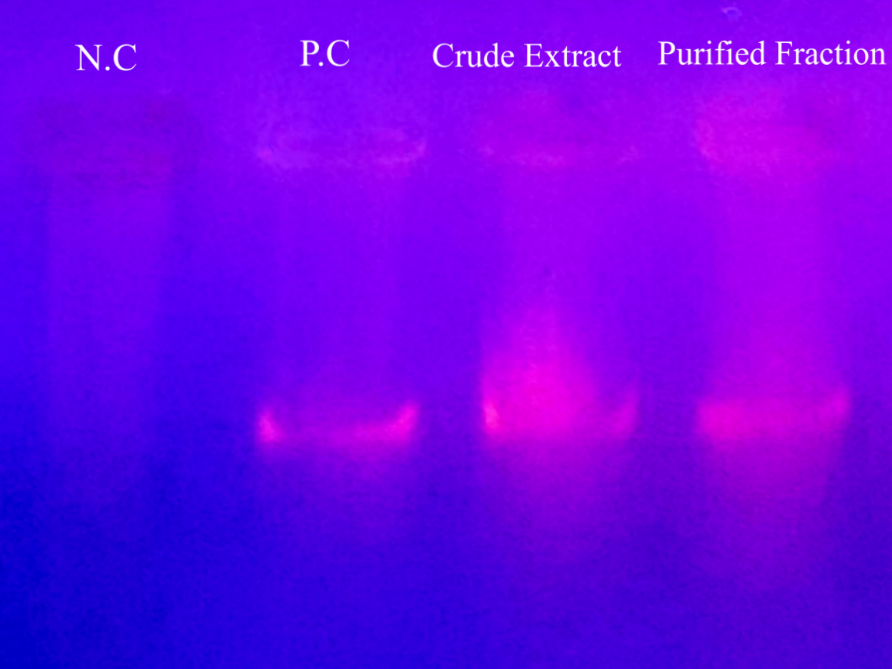


**Figure S2.** DNA damage prevention assay by crude and purified extract from *S. alkaliterrae* strain CH-8. Lane NC is negative control without extract. Lane PC is positive control containing pUC18. Lane CE and PE contains pUC18 plasmid treated with crude and purified extract.

**
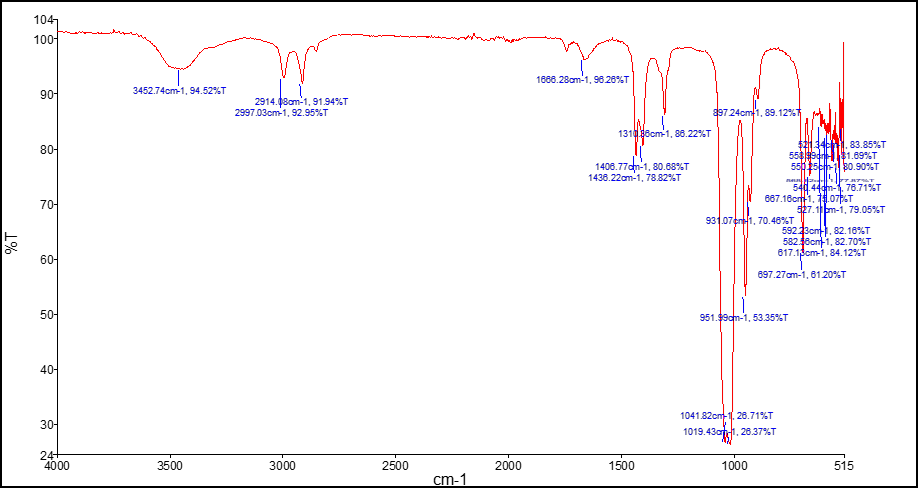
**

**Figure S3.** FTIR analysis of intracellular purified methanolic fraction of *S. alkaliterrae* CH-8.
